# Supplementary material for: Mortality reduction in 46 patients with severe COVID-19 treated with hyperimmune plasma. A proof-of-concept, single-arm, multicenter trial
Source: PubMed Central journal article supplement — Haematologica. 2020 Jul 23;105(12):2834–40. doi: 10.3324/haematol.2020.261784 (PMC7716363; doi:10.3324/haematol.2020.261784), 2020-07-23
Supplement: 2020_261784-Disclosures_Contributions.pdf [file 2020_261784-Disclosures_Contributions.pdf]

Haematologica  
HAEMATOL/2020/261784  
Version 3

Mortality reduction in 46 severe Covid-19 patients treated with hyperimmune plasma. A proof of concept single arm multicenter trial

Cesare Perotti, Fausto Baldanti, Raffaele Bruno, Claudia Del Fante, Elena Seminari, Salvatore Casari, Elena Percivalle, Claudia Glingani, Valeria Musella, Mirko Belliato, Martina Garuti, Federica Meloni, Marilena Frigato, Antonio Di Sabatino, Catherine Klersy, Giuseppe De Donno, and Massimo Franchini

Collaborative Groups: Covid-19 plasma task force (Angelo Corsico, Federica Melazzini, Marco Lenti, Cristina Mortellaro, Edoardo Vecchio Nepita, Gianluca Viarengo, Giorgio Iotti, Luciano Perotti, Marco Maurelli, Margherita Sambo, Mariangela Delliponti, Raffaele Di Martino, Roberta Maserati, Valentina Zuccaro, Gennaro Mascaro)

Disclosures: None to declare

Contributions: CP, FB, RB, CK, CDF: Concept and design of the study: CK, VM: Data analysis CK, CP, FB, RB, CDF, MF: manuscript writing CP CK : study supervision EP, GDD, ES, MB, FM, GDS, SC, CG, MG, MF: data collection and technical support All authors : critical revision of the manuscript
